# Supplementary material for: Increased Expression of MERTK is Associated with a Unique Form of Canine Retinopathy
Source: PLoS One. 2014 Dec 17;9(12):e114552. doi: 10.1371/journal.pone.0114552 (PMC4269413; doi:10.1371/journal.pone.0114552)
Supplement: S1 Table — Summary of the targeted resequencing data. The 6.1 Mb associated region was captured and resequenced in four cases and four control SVs with opposite risk haplotypes to identify the causative mutation. (XLSX) [file pone.0114552.s003.xlsx]

## Sheet: Sheet1
Table S1. Results of the targeted sequencing data.
	Sample	% of target region mapped	Mean coverage in target region	Number of SNVs*	Number of indels
Case	1	98.98	96	9314	262
	2	98.97	67	9260	256
	3	99.04	101	9892	268
	4	98.42	93	9275	267
Control	1	99	85	11228	304
	2	98.69	108	12150	301
	3	98.81	87	12328	319
	4	98.81	92	12713	317
Case specific variants				408	70
* Single nucleotide variant
